# Supplementary material for: Isolation, Characterization and Genomic Analysis of a Novel Jumbo Phage, AerS_266, That Infects Aeromonas salmonicida
Source: MDPI journal article supplement (doi:10.3390/microorganisms11112649), 2023-10-28
Supplement: s1 [file s1]

**Figure S1.** Agarose gel-electrophoresis of the phage AerS\_266 DNA hydrolysis

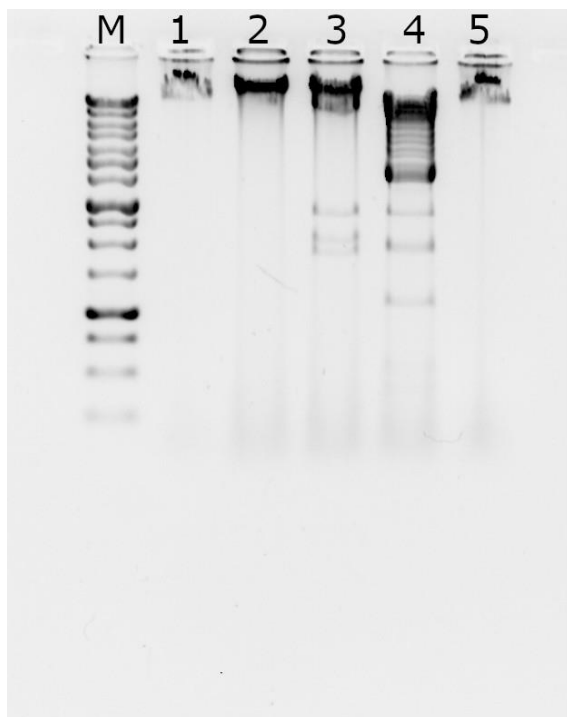

Lines: M – DNA ladder 50kb (SibEnzyme, Russia); 1, 5 – intact AerS\_266 DNA; 2 – DNA hydrolysis using *ApaI*; 3 – DNA hydrolysis using *SalI*; 4 – DNA hydrolysis using *SmaI*
