# Supplementary material for: Isolation, Characterization and Genomic Analysis of a Novel Jumbo Phage, AerS_266, That Infects Aeromonas salmonicida
Source: MDPI journal article supplement (doi:10.3390/microorganisms11112649), 2023-10-28
Supplement: s1 [file s1]

**Table S1.** *Aeromonas* spp. strains screened in host range assay

| N<br>o | Species_16S                  | CEMTC<br>No   | Isolation source                                             | Temperature of<br>growth, °C | NCBI<br>GenBank ID<br>for 16S rRNA |
|--------|------------------------------|---------------|--------------------------------------------------------------|------------------------------|------------------------------------|
| 1      | <i>A. allosaccharophila</i>  | 7413          | Lake in Novosibirsk region, Siberia,<br>Russia               | 25                           | OQ332360                           |
| 2      | <i>A. caviae</i>             | 2395          | Waste waters in Phuket, Thailand                             | 37                           | OP218045                           |
| 3      | <i>A. hydrophila</i>         | 2094          | River in Dalat, Vietnam                                      | 30                           | OP849657                           |
| 4      | <i>A. hydrophila</i>         | 6279          | Lake in Kemerovo region, Siberia, Russia                     | 25                           | OQ332358                           |
| 5      | <i>A. hydrophila</i>         | 7426          | Pond in Primorsky region, Far-East of<br>Russia              | 25                           | OQ332361                           |
| 6      | <i>A. hydrophila</i>         | 8139          | Pond in Adler, Krasnodar region, Russia                      | 25                           | OQ834572                           |
| 7      | <i>A. jandaei</i>            | 1458          | Waterfall in North Goa, India                                | 37                           | ON479599                           |
| 8      | <i>A. media</i>              | 5475          | River in Novosibirsk region, Siberia,<br>Russia              | 25                           | OP659002                           |
| 9      | <i>A. media</i>              | 7654          | River in Novosibirsk region, Siberia,<br>Russia              | 25                           | OQ332364                           |
| 10     | <i>A. media</i>              | 8112          | Pond in Adler, Krasnodar region, Russia                      | 25                           | OQ834573                           |
| 11     | <i>A. media</i>              | 8147          | River in Omsk region, Siberia, Russia                        | 25                           | OQ913697                           |
| 12     | <i>A. popoffii</i>           | 1430          | River in the Death Valley, Kamchatka<br>peninsula, Russia    | 30                           | ON479598                           |
| 13     | <i>A. popoffii</i>           | 3381          | Lake in Ulagan region, Altay republic,<br>Siberia, Russia    | 22                           | ON479601                           |
| 14     | <i>A. popoffii</i>           | 4062          | River in Novosibirsk region, Siberia,<br>Russia              | 28                           | ON479602                           |
| 15     | <i>A. rivipollensis</i>      | 6434          | Lake in Kazan, Tatarstan republic,<br>Russia                 | 25                           | OP659005                           |
| 16     | <i>A. salmonicida</i>        | 1370          | Lake in Altay region, Siberia, Russia                        | 37                           | OP849654                           |
| 17     | <i>A. salmonicida</i>        | 3364          | Lake in Ulagan region, Altay republic,<br>Siberia, Russia    | 37                           | ON479600                           |
| 18     | <b><i>A. salmonicida</i></b> | <b>3375*</b>  | Lake in Ulagan region, Altay republic,<br>Siberia, Russia    | 25                           | OR226260                           |
| 19     | <i>A. salmonicida</i>        | 4331          | Lake in Novosibirsk region, Siberia,<br>Russia               | 25                           | OP849658                           |
| 20     | <b><i>A. salmonicida</i></b> | <b>4537**</b> | Pond in Novosibirsk region, Siberia,<br>Russia               | 25                           | OP218048                           |
| 21     | <i>A. salmonicida</i>        | 4546          | Mineral water spring, Sakhalin region,<br>Far-East of Russia | 25                           | ON479605                           |
| 22     | <i>A. salmonicida</i>        | 5456          | Lake in Ulagan region, Altay republic,<br>Siberia, Russia    | 22                           | OP218051                           |
| 23     | <b><i>A. salmonicida</i></b> | <b>5599</b>   | Pond in Novosibirsk region, Siberia,<br>Russia               | 25                           | OP849659                           |
| 24     | <i>A. salmonicida</i>        | 5828          | Swamp in Altay region, Siberia, Russia                       | 25                           | OP849660                           |
| 25     | <i>A. salmonicida</i>        | 5875          | River in Altay region, Siberia, Russia                       | 25                           | OR226261                           |
| 26     | <i>A. salmonicida</i>        | 7512          | Swamp in Novosibirsk region, Siberia,<br>Russia              | 25                           | OQ332363                           |
| 27     | <b><i>A. salmonicida</i></b> | <b>7722</b>   | River in Novosibirsk region, Siberia,<br>Russia              | 25                           | OQ913695                           |
| 28     | <i>A. salmonicida</i>        | 8183          | Coastal area of the river, Omsk region,<br>Siberia, Russia   | 25                           | OQ913698                           |
| 29     | <i>Aeromonas</i> sp.         | 1369          | Lake in Altay region, Siberia, Russia                        | 37                           | OP218042                           |
| 30     | <i>Aeromonas</i> sp.         | 1354          | Lake in Altay region, Siberia, Russia                        | 37                           | OP849653                           |
| 31     | <i>Aeromonas</i> sp.         | 4529          | Pond in Novosibirsk region, Siberia,<br>Russia               | 25                           | OP218047                           |
| 32     | <i>A. veronii</i>            | 1362          | Lake in Altay region, Siberia, Russia                        | 37                           | ON479597                           |

|    |                   |      |                                                                           |    |          |
|----|-------------------|------|---------------------------------------------------------------------------|----|----------|
| 33 | <i>A. veronii</i> | 1414 | Thermal field in Caldera Uzon,<br>Kamchatka peninsula, Far-East of Russia | 30 | OP849655 |
| 34 | <i>A. veronii</i> | 1416 | Thermal field in Caldera Uzon,<br>Kamchatka peninsula, Far-East of Russia | 30 | OP218043 |
| 35 | <i>A. veronii</i> | 5502 | River in Ongudai region, Altay republic,<br>Siberia, Russia               | 25 | OQ332355 |
| 36 | <i>A. veronii</i> | 6243 | River in Kazan, Tatarstan republic,<br>Russia                             | 25 | OQ332357 |
| 37 | <i>A. veronii</i> | 6289 | Spring in Kemerovo region, Siberia,<br>Russia                             | 25 | OQ332359 |
| 38 | <i>A. veronii</i> | 4064 | River in Novosibirsk region, Siberia,<br>Russia                           | 28 | ON479603 |
| 39 | <i>A. veronii</i> | 6436 | Lake in Kazan, Tatarstan republic,<br>Russia                              | 25 | OP659006 |
| 40 | <i>A. veronii</i> | 6618 | Pond in Novosibirsk region, Russia                                        | 25 | OP659007 |
| 41 | <i>A. veronii</i> | 7112 | River in Kazan, Tatarstan republic,<br>Russia                             | 25 | OQ913692 |
| 42 | <i>A. veronii</i> | 7445 | Pond in Adler, Krasnodar region, Russia                                   | 25 | OQ332362 |
| 43 | <i>A. veronii</i> | 7500 | Swamp in Novosibirsk region, Siberia,<br>Russia                           | 25 | OQ913693 |
| 44 | <i>A. veronii</i> | 7638 | Lake in Novosibirsk region, Siberia,<br>Russia                            | 25 | OQ913694 |
| 45 | <i>A. veronii</i> | 8132 | Pond in Adler, Krasnodar region, Russia                                   | 25 | OQ913696 |

\*Susceptible strains are marked with bold, \*\*Host strain for phage AerS\_266
